# Supplementary material
Source: Research Square preprint supplement (doi:10.21203/rs.3.rs-9522847/v1)
Supplement: Supplementary file 1 [file 00e18a6bb5bdc24948879f73.docx]

Table . Identification of medicinal plants used in treatment of cattle diseases in Serere

**Family Botanical name Local name Plant part used**

Meliaceae *Azadirachta indica* Abac Leaves, roots

Alliaceae *Allium fimbritum* Apecelit Bulb

Fabaceae *Albizia glaberrima* Ebatat Roots

Euphorbiceae *Synadenium compactum* Ebuluka Roots

Cucurbitaceae *Coccinia adoensis* Edalidal Roots

Compositae *Vernonia lasiopus* Edwarei Roots

Mimosaceae *Acacia melifera* Egirigiroi Roots

Poceae *Spirobolus pyramidalis* Ejanit Roots

Menispermaceae *Chasmanthera dependens*  Ejepat Roots

Euphorbiaceae *Jatropha curcas* Ejumula Roots

Pedaliaceae *Sesamum indicum* Ekanyumut lo Okutui Whole plant

Verbenaceae *Vitex madiensis* Ekarukei Roots

Mimosaceae *Acacia hockii* Ekisim Roots

Fabaceae *Acacia Senegal* Ekodokodoi Roots

[Combretaceae](http://en.wikipedia.org/wiki/Combretaceae) *Terminalia brownii* Ekoroi Roots

Combretaceae *Combretum binderanum* Ekulony Roots

Fabaceae *Zapoteca portoricensis*  Ekurau Roots

Vitaceae *Strychnos innocua* Ekwalakwala Stems, seeds

Polygalaceae *Securidaca longipedunculata* Elilioi Roots

Meliaceae *Milicia excelsa* Eluwa Roots

Lamiaceae *Ocimum basicum* Emopim Leaves, stems

Solanaceae *Capsicum frutescens* Emulalu Roots

Poaceae *Cynodon dactylon* Emuria Roots, stolons

Apocynaceae *Carissa spinarum* Emuriei Roots

Urticaceae *Urera hypseldendron* Emus Roots

Bromeliaceae *Ananas comosus* Enanasi Bark

Papilionaceae *Erythrina abyssinica* Engosorot Roots

Asteraceae *Bidens pilosa* Enyikmon Leaves and stems

Caricaceae *Carica papaya* Epapali Leaves

Tiliaceae *Grewia mollis spp.* Eparis Roots

Euphorbiaceae *Euphorbia candelabrum* Epopong Stems

Meliaceae *Pseudocedrela kotschyi* Eputon Roots

Poaceae *Bambusa basihirsuta* Esuretait Roots

Cucurbitaceae *Cucumis dipsaceus* Akolit Fruit

Mimosaceae *Acacia sieberiana* Etirir Roots

Vitaceae *Cissus quadrangularis* Egego Whole plant

Menispermaceae *Chasmanthera sp.* Etubot Roots

Solanaceae *Solanum incanum* Etulelut Roots

Capparaceae *Capparis fascicularis* Eutudolei Roots

Fabaceae *Tamarindus indica* Epeduru Whole plant

Table : Summary of medicinal plant parts used

**Plant Part Used Frequency Percentage**

Fruit 2 5

Leaves 1 2.5

Bulb 1 2.5

Leaves & Stem 2 5

Leaves &Roots 1 2.5

Roots 28 70

Stem 1 2.5

Stem and seed 1 2.5

Whole Plant 3 7.5

**Total 40 100**

Table . Methods used in the preparation and administration routes of medicinal plants

| **Botanical name** | **Local name** | **Disease treated** | **ROA** | **PM** | **Preparation recipe** | | | |
| --- | --- | --- | --- | --- | --- | --- | --- | --- |
| *Azadirachta indica* | Abac | Cough Coccidiosis, Anaplasmosis, myiasis,  Helminthosis | O | C | About ½ kg of mature leaves and roots pounded,  add 3L of cold water, or boil 1kg of roots in 2L of water | | | |
| *Allium fimbritum* | Apecelit | ECF, Calf scours. | O | C | The bulb is cut into pieces, crushed into paste mixed with cold water, decanted to form a drench. | | | |
| *Albizia glaberrima* | Ebatat | ECF | O | C | Pound and boil 200g of fresh roots in 1L of water and then strain. | | | |
| *Synadenium compactum* | Ebuluka | ECF, FMD, Worms, Inflammation | O,T | C | Pound leaves add few drops of clean water or crush 1kg of roots add 2L of cold water.  Collect 300ml of sap into small bottle. | | | |
| *Coccinia adoensis* | Edalidal | Cataracts, Nagana | E,O | C | 3fruits sliced and crushed + 1 tea spoon salt + little water (250g). | | | |
| *Vernonia lasiopus* | Edwarei | Poor Milk let down , mastitis, ECF | O | C,D | About ½ kg of mature leaves pounded, add 3L of cold water, or boil 1kg of roots in 2L of water. | | | |
| *Acacia melifera* | Egirigiroi | Snake bites, CBPP | O | C | Two handfuls of roots (500g) each crushed mixed in 1L of water. | | | |
| *Spirobolus pyramidalis* | Ejanit | Retained placenta | O | C | Pound clean roots, add few drops of water and little salt | | | |
| *Chasmanthera dependens* | Ejepat | Wounds, worms | O,T | C | About ½ kg of mature stem and bark pounded, add 2L of cold water and strain 1L of extract solution. | | | |
| *Jatropha curcas* | Ejumula | Retained placenta, Bloat, wounds | O | C | The clean root is pounded and soaked in cold water, To ½ kg of leaves add 1 liter of water boil to remain with ½ liter. | | | |
| *Sesamum indicum* | Ekanyumut lo Okutui | Bovine TB, Poor Milk let down, tick control. | O,T | C | Pound 100g of dried seeds and mix with little water.  Pound 200g of dried seeds and mix with feeds. | | | |
| *Vitex madiensis* | Ekarukei | Cataracts, Worms | E,O | C | Young soft leaves (250g) freshly crushed; add little water (100ml), squeeze out the cold extract for. Pound 0.3kg roots +salt, add to 1L water. | | | |
| *Acacia hockii* | Ekisim | Diarrhea, Metritis | O | C | Add 2L water to pounded 1kg of fresh roots & let mixture stand for few minutes before straining | | | |
| *Acacia Senegal* | Ekodokodoi | Cataracts, LSD, Anaplasmosis, navel infection. FMD, Wounds, ECF | O,T | C | Pound a handful of roots (250g),300g strained for navel drops, add 1liter of water, boil to remain ½liter | | | |
| *Terminalia brownie* | Ekoroi | Cataracts, snake bites,, scorpion bites, Wounds  Anaplasmosis, ECF. | O | C | Pound clean roots (500g), add 1L of water and 1 tea spoon of salt for drench.  Pound clean roots, add little water and strain the extract for eye drops. | | | |
| *Combretum binderanum* | Ekulony | ECF | O | D | Cleaned roots pound, add to500ml water boil then strain + pinch of table salt. | | |
| *Zapoteca portoricensis* | Ekurau | Cataracts | E | C | Pound a handful (100g) of roots, add little water and strain out juice. | | |
| *Strychnos innocua* | Ekwalakwala | ECF, Diarrhea | O | C | Pound a handful of roots, to 1/2L of water stir well, boil leave cool then strain. | | |
| *Securidaca longipedunculata* | Elilioi | Retained placenta, ECF, FMD, Cough  LSD, Pneumonia | O | C | Pound a handful of roots/ (250g), to 2L of look warm water stir well, leave cool then strain. | | |
| *Milicia excels* | Eluwa | Coccidiosis in calves | O | C | Pound a handful of roots (250g), add 1liter of water, boil to remain ½ liter | | |
| *Ocimum basicum* | Emopim ( lo apolon) | Infertility in bulls | O | D | About ½ kg pounded leaves and boiled in 1L of water and cooled | | |
| *Capsicum frutescens* | Emulalu | Cataracts, ECF, Skin diseases, Pink eye  Helminthosis | E,O,T | C | Collect 0.2kg of young fruits or about 100g of fruits with seeds.  Add 1L water to pounded 1kg of fresh roots+ leaves & let mixture stand for few minutes before straining. | | |
| *Cynodon dactylon* | Emuria | Ulcers, Wounds, milk production, stomach tonic. | T | C | Powdered stolons (250g) + pitch of salt + 250ml of clean look warm water.  ( plant is crushed to make a paste) | | |
| *Carissa spinarum* | Emuriei | CBPP, Cough, ECF  LSD, diarrhea.  intestinal  adhesions | O | C | Pound and boil 200g of *Carissa* fresh roots in 1L of water. | | |
| *Urera hypseldendron* | Emus | Ring worm, Anaplasmosis, Snake bites, Lung worms, CBPP, ECF, Intestinal worms, Ulcers | O,T | C | Two handfuls of roots crushed and squeezed in 1L of water until they form brown froth (solution). | | |
| *Ananas comosus* | Enanasi | Milk Let down, Skin diseases | O,T | C | Chop 1kg young fruits or mature fruits mashed add to 500ml water.  Fruits mashed to paste for topical use. | | |
| *Erythrina abyssinica* | Engosorot | ECF, Diarrhea, retained placenta | O | D | Crushed roots 250g, add to 500ml water boil + one tea spoon of salt. | | |
| *Bidens pilosa* | Enyikimon | Cataracts, wounds | E,T | C | Young fruits and leaves (250g) freshly crushed; add little water (100ml).  Squeeze out the cold extract. | |
| *Carica papaya* | Epapali | Bloat, Diarrhea, worms | O | C,P | Chop 1kg young fruits or about 100g of seeds, 250g roots to 1L of water.  Grind 1kg of dry leaves to powder +1L of cold water. | |
| *Grewia mollis* | Eparis | Anaplasmosis, constipation | O | C | Roots, bark pounded to paste (500g) + 250ml water to form sticky extract. | |
| *Euphorbia candelabrum* | Epopong | ECF, Tick control,  Anaplasmosis | O,T | C | About 500g roots pound + 2L water+caco3  Collect 200ml of sap, crush about 20cm stem + 1L of water. | |
| *Pseudocedrela kotschyi* | Eputon | Worms, Anaplasmosis, ECF, heart water | O | C,D | Pound about 0.3kg of root bark and boil in 2L cold of water,  Pound about 300g of root bark add to cold water. | |
| *Bambusa basihirsuta* | Esuretait | ECF, Bloat | O | C | Pound a handful of chopped roots and sprouting young plants(200g), add 1liter of water + pinch salt, let mixture stand for few minutes before straining | |
| *Cucumis dipsaceus* | Akolit | Poor Milk down, Endometritis, Retained placenta. | O | C | Crush about ½ kg of mature fresh fruits add little water and filter. | |
| *Acacia sieberiana* | Etirir | Dystocia, Cough, Retained placenta | O | C | Two handfuls of roots crushed well, add to 500ml of water + pinch of table salt (fanta bottle) | |
| *Ciccus quadrangularis* | Egego | Nagana, Worms ,LSD, abscess | O,T | C | 300g leaves and roots crushed one tea spoon salt to from stick solution. | |
| *Chasmanther sp.* | Etubot | ECF, Diarrhea, Worms. | O | C | Pound 200g of the tuber or stem add in 1L of water + pinch of salt. | |
| *Solanum incanum* | Etulelut | Worms, Cataracts  Otitis with pus, Diarrhea | O,E | C | Pound a handful (0.3kg) of roots; boil in 1 liter of water to reduce to half liter extract.  Puncture yellow ripe fruit and squeeze juice (drops). | |
| *Capparis fascicularis* | Eutudolei | CBPP, ECF, LSD , Heart water, snake bite, Anaplasmosis | O | C | Two handful crushed roots, add to 1L water + a pinch of salt. |
| *Tamarindus indica* | Epeduru | Worms, Cough, Wounds | O,T | C | Pound about 200g of roots, add ½L water and strain,  To about 0.2kg, add little water and strain to conc. Solution. |

Key: **ROA**=Route of Administration, **O**=oral, **T**=topical, **E**=eye drop, **OT**=oral and topical, **OE**=oral and eye drop, **EOT**=eye drop, oral and topical, **ET**=eye drop and topical, **FMD**=foot and mouth disease, **LSD**=lumpy skin disease, **ECF**=East coast fever, **CBPP**=Contagious bovine pleuro pneumonia, **PM**=preparation method, **C**=cold extract, **D**=decoction, **P**=powder, **C,D**=cold extract and decoction, **C,P**= cold extract and powder.

##

Table 4. Summary of the methods used in preparation of medicinal plants remedies

**Preparation method Frequency Percentage**

Decoction 5 11.4%

Cold extract 38 86.4%

Powder extract 01 2.3%

##

Table 5. Summary of the routes of administration

**Routes of administration Number of plants Percentage number of plants**

Oral 37 68.5

Topical 12 22.2

Eye drop 05 9.3

Total 54 100

Table 6. Common cattle diseases treated by the medicinal plants in Serere district

**Common disease name Local name Suspected Cause (s)**

Poor Milk let down Amamus na akile Poor breed

Cataracts Etotule Injuries

Diarrhea Aurutu Young grass,

FMD Ocigicig /omulat Unknown

ECF Angarue Ticks, much milk

Wounds Ajimis Injuries

Dystocia Edoutene Poor breed/big calf

Bloat, Egwe Young grass

Coccidiosis Ookota Unknown

LSD, Enaruru Dry season

Anaplasmosis, Epiu Dry season

Navel infection Adeka na aliliget Dirt

Intestinal Worms Ikur Dirty water

CBPP Oukoi Dry season

Mastitis Adeka na ikisinga Monitor lizard bites

Ring worm, Elowa Heavy rains

Snake bites Akonyasit emun Snakes

Lung worms, Ikuru lo oukoi Dirty water

Retained placenta Angasiep First calving

Infertility in bulls Aidongeikit Unknown

Cough Aola Worms

Ulcerations in the mouth Ajimis Injuries

Skin diseases Adeka na emukule Unknown

Heart water Airimirim Ingestion of polythene paper

Scorpion bites Akonyet ekiriton Scorpion bites

Ticks Imadang Wet season

Trypanosmosis Eseny Rainy season, Tsetse flies

Inflammation Abutun Injuries

A total of 28 diseases and conditions were found to be treated using the identified medicinal plants, their possible causes as per respondents knowledge has been documented with ECF being the most prevalent (61% ),Worms (39%), Anaplasmosis (32%), Catracts and Retained placenta being (25%) among others.
