# Supplementary material
Source: Research Square preprint supplement (doi:10.21203/rs.3.rs-9522847/v1)
Supplement: Supplementary file 2 [file a6b59b68b4178320b4f5271f.docx]

**QUESTIONNAIRE**

A staff of Busitema University is undertaking a study on tittle “**Medicinal plants used in the treatment of cattle diseases in Serere district”.** The purpose of this study is to identify and document the medicinal plants used in treatment of cattle diseases in the district. Any information as may be provided by you shall be kept highly confidential. Your cooperation during this study is highly appreciated.

DATE…………………………………..QUESTIONAIRE NUMBER………………………

COUNTY…………………………………………….SUBCOUNTY……………………….........

PARISH…………………………………………………VILLAGE………………………………

**Section A: Respondent’s biodata**

**Sex of the respondent**

a. Female b. Male

**Age of the respondent**

a. < 18 years b. 19-35 years c.35-50 years d. Above 51 years

**Religious affiliation**

a. Catholic b. Protestant c. Muslim d. Pentecostal

e. Others specify………………………………………………………….

**Education levels**

a. None b. Primary c. Junior d. Secondary

e. Tertiary

**Section B: Identification of medicinal plants**

1. Do you know of any medicinal plant that has been used in your community for treatment of cattle diseases?

Yes No

1. Have you ever given a trial to use any plant for treatment of any health condition in your cattle herd?

Yes No

1. If yes, which plants have you ever used to treat cattle in your community?

…………………………………………………………………………………………

1. What are the local names of these plants?

.................................................................................................................................

……..…..............................................................................................................

**Section C. Common diseases treated by medicinal plants**

1. Which diseases or conditions have you been trying to treat with those medicinal plants?

. …………………………………………………………………………………….......

6. Are there some other diseases conditions which these plants can treat? If yes, name them

Yes. I don’t know No

…………………………………………………………………………………..

7. Is it possible for you to show me these medicinal plants?

Yes No

8. For how long have you been using these plants?

≤5 years ≤ 10 years ≤ 20 years

≤50years

9. Did these plants fully solve the problems which your cattle had?

Yes No

10. Which plant parts are used for each particular plant?

Leaves Stems Seeds

Roots

Fruits Bark

Others specify…………………………………………..

**Section D. Medicinal plants preparation**

11. In which condition do you always prepare these medicinal plants?

Dry form Fresh form Both

12. What preparation method do you use for these plants?

Powder Extract Cold extract

Decoction Others, specify……………………………………………………….

13. Do you quantify the preparations before administering?

Yes No

14 .What quantity of the plant preparation do you always use for each animal?

………………………………………………………………………………………………………15. Are there some other substances/solvents which can be mixed with these plants?

Yes No

16. What are these substances or solvents which can be mixed with these medicinal plants before administering to the animals?

…………………………………………………………………………………………………

17. How are these substances mixed with the medicinal plants?

…………………………………………………………………………………………………

18. How do you administer these medicines which have been prepared for the animals?

……………………………………………………………………………………..

19. How did you get to know about medicinal plants used for animal treatment?

Older family members Friends and relatives Workshops

Other elders’ Trial and error

**Section E. The challenges in medicinal plants use**

20. Have you ever found any challenge while using these medicinal plants?

No Yes

21. What are these challenges you have faced in the use of these medicinal plants for treatment of cattle diseases.

………………………………………………………………………………………………………

………………………………………………………………………………………………………

22. Do you have a specific place where you get these plants from?

Yes No

23. If yes, where exactly?

Bush Forest

Agricultural gardens Botanical gardens

Others specify………………………………………………………………………………………...

…………………………………………………………………………………………………..

Thank you.
